# Supplementary material for: Profiles of Cytokinins Metabolic Genes and Endogenous Cytokinins Dynamics during Shoot Multiplication In Vitro of Phalaenopsis
Source: MDPI journal article supplement (doi:10.3390/ijms23073755), 2022-03-29

## Supplementary information

**Table S1.** List of primers used in this study.

| Gene name          | Forward primer (5-3')   | Reverse primer (5-3')     |
|--------------------|-------------------------|---------------------------|
| <i>PaIPT1</i>      | GGTAGTGAACGCCGACAAGA    | CAGCGAGAGATCGAAACCCC      |
| <i>PaIPT2</i>      | CTCGAGGACTGAAGCAAGCA    | TTCCGTTCAAGGCAGAAGCA      |
| <i>PaIPT3</i>      | CTTTATCCTCGGCTCCACCG    | TCGGAGTTGATGACTTCGCC      |
| <i>PaIPT4</i>      | AGGTACTGTGGCTGCTTACG    | CTACTACAGGCGATGCGTCC      |
| <i>PaIPT5</i>      | TCAGATCCTCGGGGTTTCCT    | CCTCGCACCGCAGATCAATA      |
| <i>PaIPT6</i>      | TGAGACGGTGAGGAGGTTTC    | GTTCTCTTCGCTGATCTCCAC     |
| <i>PaLOG1</i>      | GTGCCCATGAGTTGCTGTCT    | GCTGCTCCATCTCCCAACTC      |
| <i>PaLOG2</i>      | TCCTGGTGGGTATGGGACAA    | TGCCTTGCTGAGCTCTCTATG     |
| <i>PaLOG3</i>      | TGGGCTCAATTAGGCATCCA    | GATATGCCGAGCACTTGGACT     |
| <i>PaLOG4</i>      | GGTGGCGAGGAACATTGACT    | CCGCCATTAAAGACTGCCTG      |
| <i>PaLOG5</i>      | GTTGGGGAAGTTCTAGCGGT    | TTCCATAGCCACCAGGCAAA      |
| <i>PaLOG6</i>      | ATTTGGGCCCGAGAACTGGTG   | CCAAGAACATCACAACCCCC      |
| <i>PaCKX1</i>      | CTGGAGGAAATGGCGATAGG    | GGATCAAACCTCCTCTTCAGAT    |
| <i>PaCKX2</i>      | CCACGTTCTTCAGGTCAGGA    | GGATGGCCAGGGGATCAAAA      |
| <i>PaCKX3</i>      | GGCCAACACAACCTATGGGTC   | CATCTGGAATTGTTGTTGACATCCT |
| <i>PaCKX4</i>      | CCCCTTCCAATCCCGTGAACA   | CCGTTGTGAAGACCGAACCC      |
| <i>PaCKX5</i>      | GAGGTGGTGACTGGAAAGGG    | TGCTGTGGAGCATCTTGGAG      |
| <i>PaCKX6</i>      | AAAGCTAACGAGCGGGCCTA    | GGGCCGTAACGAAAGGTCTG      |
| <i>PaUbiquitin</i> | TGAACTCCATCGCCTTCCTCTTC | TGAAGCATGGCATCAATTTTC     |

**Table S2.** *IPT* genes identified from *P. aphrodite* genome, along with their molecular details and relevant genomic information.

| Gene name <sup>a</sup> | Locus <sup>b</sup> | Chr <sup>c</sup> | Length <sup>d</sup> | IPPT <sup>e</sup> | IPT <sup>e</sup> | Family <sup>f</sup> | E value <sup>g</sup> | Identity (%) <sup>h</sup> | TargetP <sup>i</sup> | Glycosylation Site <sup>j</sup> |
|------------------------|--------------------|------------------|---------------------|-------------------|------------------|---------------------|----------------------|---------------------------|----------------------|---------------------------------|
| <i>PalIPT1</i>         | PAXXG118600        | L10a             | 335                 | 5.37e-31          | 1.89e-03         | AtIPT1              | 1.89e-94             | 48.065                    | MT                   | 0                               |
| <i>PalIPT2</i>         | PAXXG226240        | L08a             | 502                 | 2.98e-59          | -                | AtIPT2              | 3.17e-156            | 51.982                    | Other                | 1                               |
| <i>PalIPT3</i>         | PAXXG097640        | L04              | 306                 | 1.51e-34          | 7.26e-03         | AtIPT3              | 1.52e-89             | 47.97                     | Other                | 1                               |
| <i>PalIPT4</i>         | PAXXG213053        | Sca234           | 284                 | 2.44e-29          | 1.61e-03         | AtIPT8              | 3.99e-91             | 46.181                    | Other                | 0                               |
| <i>PalIPT5</i>         | PAXXG302430        | L13              | 449                 | 3.07e-78          | 1.13e-06         | AtIPT9              | 2.3e-165             | 53.125                    | CH                   | 3                               |
| <i>PalIPT6</i>         | PAXXG097630-       | L04              | 340                 | 8.93e-35          | 1.34e-04         | AtIPT3              | 2.95e-90             | 46.392                    | Other                | 2                               |

<sup>a</sup>Gene Names given to *PalIPTs* in this work.

<sup>b</sup>Locus represented by the *P. aphrodite* genome database.

<sup>c</sup>Chromosomal localization of the *PalIPTs*, Sca represents scaffold.

<sup>d</sup>Length the number of amino acids

<sup>e</sup>PFAM e-values for having the indicated protein domains. PFAM e-values for having the indicated protein domains. IPT domain means Isopentenyl transferase, and IPPT domain means IPPT transferases in PFAM database.

<sup>f</sup>Closest homologs from *Arabidopsis thaliana*.

<sup>g</sup>Blastp e-values for having the indicated protein domains.

<sup>h</sup>Percentage of identical amino acids with the closest *Arabidopsis thaliana* homologs

<sup>i</sup>Localization predicted with TargetP-2.0. "SP" for signal peptide, "MT" for mitochondrial transit peptide (mTP), "CH" for chloroplast transit peptide (cTP), "TH" for thylakoidal lumen composite transit peptide (ITP), "Other" for no targeting peptide (in this case, the length is given as 0).

<sup>j</sup>Glycosylation sites are predicted with NetNGlyc - 1.0

**Table S3.** *LOG* genes identified from *P. aphrodite* genome, along with their molecular details and relevant genomic information.

| Gene name <sup>a</sup> | Locus <sup>b</sup> | Chr <sup>c</sup> | Length <sup>d</sup> | Lysine_decarbox <sup>e</sup> | Family <sup>f</sup> | E value <sup>g</sup> | Identity (%) <sup>h</sup> | TargetP <sup>i</sup> | Glycosylation Site <sup>j</sup> |
|------------------------|--------------------|------------------|---------------------|------------------------------|---------------------|----------------------|---------------------------|----------------------|---------------------------------|
| <i>PaLOG1</i>          | PAXXG136830        | L03              | 221                 | 9.17e-60                     | AtLOG1              | 3.81e-122            | 76.555                    | Other                | 1                               |
| <i>PaLOG2</i>          | PAXXG166050        | L05a             | 244                 | 2.58e-56                     | AtLOG1              | 5.12e-110            | 67.805                    | Other                | 0                               |
| <i>PaLOG3</i>          | PAXXG233850        | Sca192           | 215                 | 1.19e-65                     | AtLOG1              | 1.19e-138            | 85.849                    | Other                | 0                               |
| <i>PaLOG4</i>          | PAXXG280860        | Sca468           | 192                 | 1.20e-58                     | AtLOG1              | 4.41e-114            | 83.240                    | Other                | 0                               |
| <i>PaLOG5</i>          | PAXXG038340        | L15              | 229                 | 3.81e-61                     | AtLOG7              | 1.46e-117            | 80.612                    | Other                | 0                               |
| <i>PaLOG6</i>          | PAXXG106310        | L06              | 225                 | 4.65e-57                     | AtLOG8              | 8.9e-110             | 71.981                    | Other                | 0                               |

<sup>a</sup>Gene Names given to *PaLOGs* in this work.

<sup>b</sup>Locus represented by the *P. aphrodite* genome database.

<sup>c</sup>Chromosomal localization of the *PaLOGs*, Sca represents scaffold.

<sup>d</sup>Length the number of amino acids

<sup>e</sup>PFAM e-values for having the indicated protein domains.

<sup>f</sup>Closest homologs from *Arabidopsis thaliana*.

<sup>g</sup>Blastp e-values for having the indicated protein domains.

<sup>h</sup>Percentage of identical amino acids with the closest *Arabidopsis thaliana* homologs

<sup>i</sup>Localization predicted with TargetP-2.0. "SP" for signal peptide,"MT" for mitochondrial transit peptide (mTP),"CH" for chloroplast transit peptide (cTP),"TH" for thylakoidal lumen composite transit peptide (ITP),"Other" for no targeting peptide (in this case, the length is given as 0).

<sup>j</sup>Glycosylation sites are predicted with NetNGlyc - 1.0

**Table S4.** CKX genes identified from *P. aphrodite* genome, along with their molecular details and relevant genomic information.

| Gene name <sup>a</sup> | Locus <sup>b</sup> | Chr <sup>c</sup> | Length <sup>d</sup> | FAD_<br>binding_4 <sup>e</sup> | CK-bind<br>ing <sup>e</sup> | Family <sup>f</sup> | E value <sup>g</sup> | Identity<br>(%) <sup>h</sup> | TargetP <sup>i</sup> | Glycosylation<br>Site <sup>j</sup> |
|------------------------|--------------------|------------------|---------------------|--------------------------------|-----------------------------|---------------------|----------------------|------------------------------|----------------------|------------------------------------|
| <i>PaCKX1</i>          | PAXXG012950        | L15              | 496                 | 5.11e-23                       | 4.64e-102                   | AtCKX1              | 4.14e-134            | 41.955                       | SP                   | 2                                  |
| <i>PaCKX2</i>          | PAXXG031040        | L10a             | 520                 | 5.47e-19                       | 8.73e-172                   | AtCKX1              | 0                    | 64.155                       | SP                   | 4                                  |
| <i>PaCKX3</i>          | PAXXG242550        | Sca318           | 529                 | 4.64e-23                       | 6.56e-163                   | AtCKX3              | 1.58e-176            | 52.119                       | SP                   | 0                                  |
| <i>PaCKX4</i>          | PAXXG031510        | L10a             | 527                 | 2.01e-17                       | 0e+00                       | AtCKX5              | 0                    | 69.535                       | SP                   | 3                                  |
| <i>PaCKX5</i>          | PAXXG232040        | Sca286           | 544                 | 3.99e-19                       | 5.85e-143                   | AtCKX6              | 6.51e-152            | 46.951                       | SP                   | 0                                  |
| <i>PaCKX6</i>          | PAXXG098230        | L01              | 509                 | 1.47e-31                       | 2.62e-145                   | AtCKX7              | 0                    | 55.907                       | Other                | 2                                  |

<sup>a</sup>Gene Names given to *PaCKXs* in this work.

<sup>b</sup>Locus represented by the *P. aphrodite* genome database.

<sup>c</sup>Chromosomal localization of the *PaCKXs*, Sca represents scaffold.

<sup>d</sup>Length the number of amino acids.

<sup>e</sup>PFAM e-values for having the indicated protein domains.

<sup>f</sup>Closest homologs from *Arabidopsis thaliana*.

<sup>g</sup>Blastp e-values for having the indicated protein domains.

<sup>h</sup>Percentage of identical amino acids with the closest *Arabidopsis thaliana* homologs

<sup>i</sup>Localization predicted with TargetP-2.0. "SP" for signal peptide,"MT" for mitochondrial transit peptide (mTP),"CH" for chloroplast transit peptide (cTP),"TH" for thylakoidal lumen composite transit peptide (ITP),"Other" for no targeting peptide (in this case, the length is given as 0).

<sup>j</sup>Glycosylation sites are predicted with NetNGlyc - 1.0

**Figure S1.** Western blot assay showing the production of PaCKX4, PaLOG2, PaIPT1, and green fluorescent protein (GFP, the control) in the agroinfiltrated *N. benthamiana* leaves.

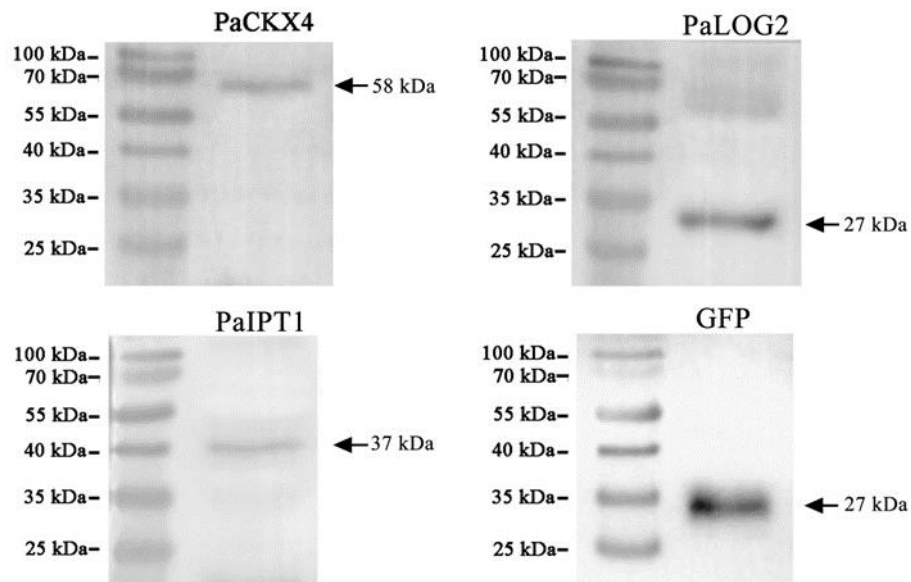

Supplement: s1 [file s1]
